# Supplementary material
Source: PubMed Central journal article supplement (PMC6641378)
Supplement: ao7b02062_si_001.pdf [file ao7b02062_si_001.pdf]

## Supporting Information

### Scale-up Fabrication of Biodegradable Poly(butylene adipate-co-terephthalate) / Organophilic-clay Nanocomposite Films for Potential Packaging Applications

Jiazhao Xie,<sup>†,§</sup> Zhou Wang,<sup>‡</sup> Qinghua Zhao,<sup>†,||</sup> Yuechao Yang,<sup>§</sup> Jing Xu,<sup>\*,†</sup> Geoffrey I.N.  
Waterhouse,<sup>†,#</sup> Kun Zhang,<sup>†</sup> Shan Li,<sup>§</sup> Peng Jin,<sup>§</sup> and Geyang Jin<sup>§</sup>

<sup>†</sup>College of Chemistry and Material Science, Shandong Agricultural University, 61 Daizong  
Street, Tai'an 271000, Shandong, China

<sup>‡</sup>State Key Laboratory of Nutrition Resources Integrated Utilization, Shandong Kingenta  
Ecological Engineering Co., Ltd, 19 Xingdaxi Street, Linshu 276700, Shandong, China

<sup>§</sup>National Engineering Laboratory for Efficient Utilization of Soil and Fertilizer Resources,  
National Engineering & Technology Research Center for Slow and Controlled Release  
Fertilizers, College of Resources and Environment, Shandong Agricultural University, 61  
Daizong Street, Tai'an 271000, Shandong, China

<sup>||</sup>Department of Basic Courses, Shandong Medicine Technician College, 999 Fengtian Road,  
Tai'an 271000, Shandong, China

<sup>#</sup>School of Chemical Sciences, The University of Auckland, Private Bag 92019, Auckland  
1142, New Zealand

\*Corresponding Author.

Jing Xu

E-mail: [jiayu@sdau.edu.cn](mailto:jiayu@sdau.edu.cn)

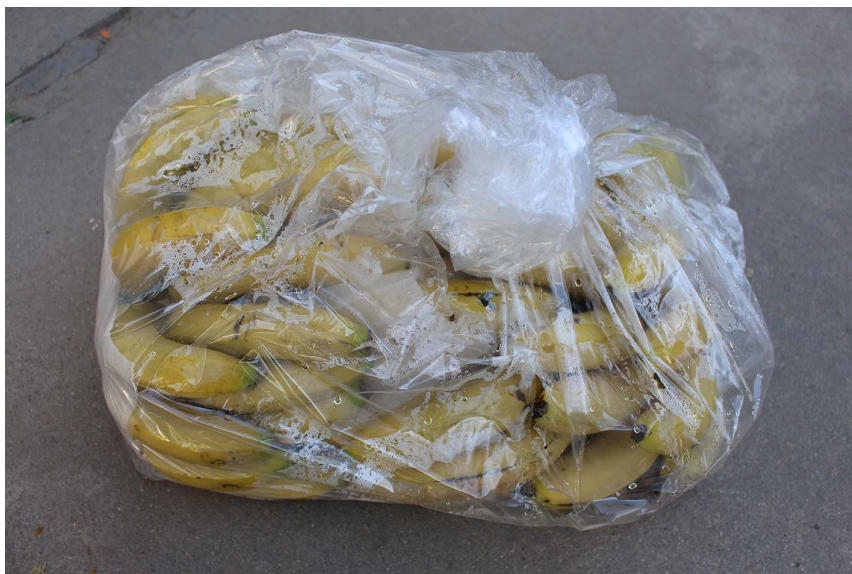

**Figure S1.** Photograph of the condensation of the water droplet of banana packed by commercial polyethylene packing film, which was sold in supermarket.

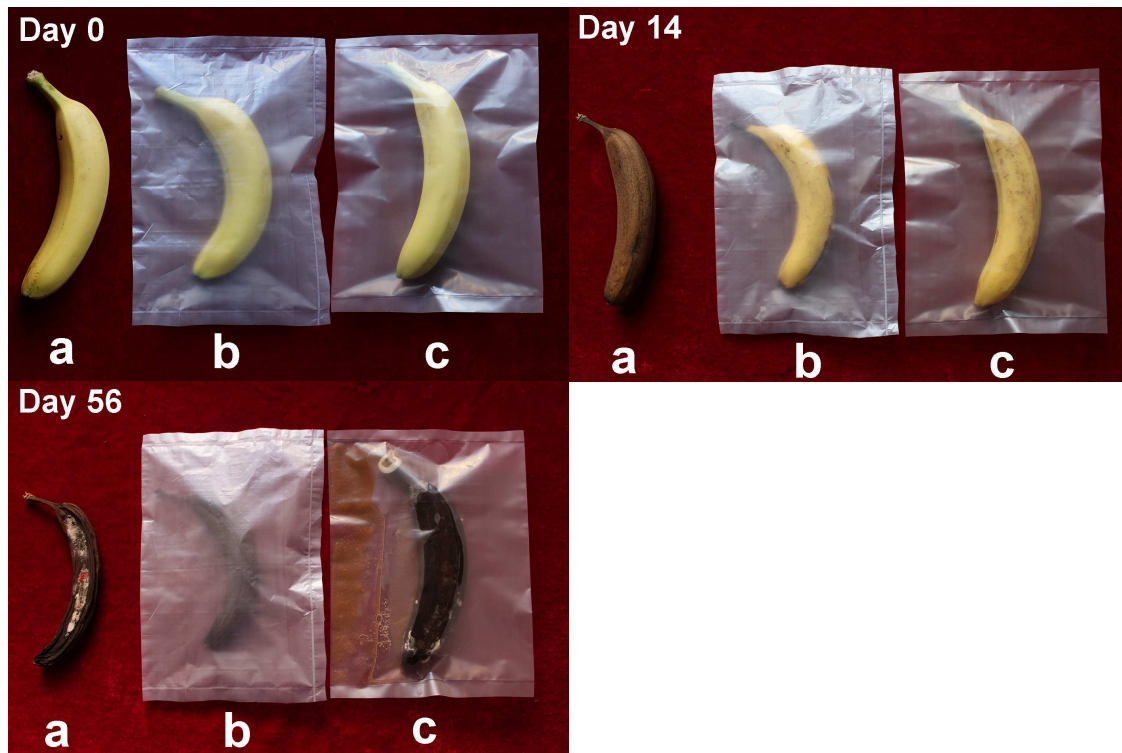

**Figure S2.** Photographs of banana samples with following treatment: (a) exposed to air, (b) packaged with OLDH-1 film and (c) packaged with commercial polyethylene film.
